# Supplementary material for: Physical binding of the tobacco smoke carcinogen NNK diazonium ion to the human tumor suppressor gene TP53 Exon 5
Source: Royal Society of Chemistry journal article supplement (doi:10.1039/c9tx00010k), 2019-01-01
Supplement: c9tx00010k1.pdf [file c9tx00010k1.pdf]

**Supporting information for:**

**Physical Binding of the Tobacco Smoke  
Carcinogen NNK Diazonium Ion to the Human  
Tumor Suppressor Gene TP53 Exon 5**

Christos Deligkaris<sup>\*,†</sup> and Evan Millam<sup>‡</sup>

*†Department of Geology and Physics, University of Southern Indiana, Evansville IN 47712,  
USA*

*‡Department of Chemistry, University of Southern Indiana, Evansville IN 47712, USA*

E-mail: Dr.Deligkaris@usi.edu

**TP53 Exon 5**

Table S1: Base pair step parameters used to construct the DNA model. The parameters are average values from experimentally determined structures.<sup>S1</sup> The parameters were obtained using the 3-Dimensional Nucleic Acids program.<sup>S2</sup> Distances are in Å and angles are in degrees. Note that complementary base pair steps (such as AA and TT) have opposite signs in Shift and Tilt.

| Base Pair Step | Shift | Slide | Rise | Tilt | Roll | Twist |
|----------------|-------|-------|------|------|------|-------|
| AA             | -0.06 | -0.16 | 3.28 | +0.1 | +1.4 | 35    |
| TT             | +0.06 | -0.16 | 3.28 | -0.1 | +1.4 | 35    |
| AC             | +0.06 | -0.43 | 3.23 | -0.3 | +1.4 | 32    |
| GT             | -0.06 | -0.43 | 3.23 | +0.3 | +1.4 | 32    |
| AG             | +0.06 | +0.34 | 3.27 | +0.2 | +5.5 | 28    |
| CT             | -0.06 | +0.34 | 3.27 | -0.2 | +5.5 | 28    |
| AT             | +0.12 | -0.57 | 3.30 | +0.3 | -1.2 | 31    |
| CA             | +0.02 | +1.88 | 3.32 | 0.0  | -1.2 | 43    |
| TG             | -0.02 | +1.88 | 3.32 | 0.0  | -1.2 | 43    |
| CC             | +0.05 | +0.28 | 3.40 | -0.1 | +3.9 | 35    |
| GG             | -0.05 | +0.28 | 3.40 | +0.1 | +3.9 | 35    |
| CG             | +0.06 | +0.68 | 3.25 | 0.0  | +6.2 | 31    |
| GA             | 0.00  | -0.01 | 3.43 | 0.0  | +0.4 | 41    |
| TC             | 0.00  | -0.01 | 3.43 | 0.0  | +0.4 | 41    |
| GC             | -0.30 | +0.31 | 3.57 | 0.0  | -6.8 | 40    |
| TA             | -0.17 | +0.38 | 3.37 | -1.4 | -0.6 | 43    |

Table S2: Base pair parameters used to construct the DNA model. The parameters are average values from experimentally determined structures.<sup>S3</sup> The parameters were obtained using the 3-Dimensional Nucleic Acids program.<sup>S2</sup> Distances are in Å and angles are in degrees. Note that M-N and N-M base pairs (such as A-T and T-A) have opposite signs in Shear and Buckle.

| Base Pair | Shear | Stretch | Stagger | Buckle | Propeller-Twist | Opening |
|-----------|-------|---------|---------|--------|-----------------|---------|
| A-T       | -0.03 | -0.18   | -0.03   | +0.83  | -14.80          | +0.12   |
| T-A       | +0.03 | -0.18   | -0.03   | -0.83  | -14.80          | +0.12   |
| G-C       | +0.08 | -0.15   | +0.10   | -1.52  | -11.80          | -0.88   |
| C-G       | -0.08 | -0.15   | +0.10   | +1.52  | -11.80          | -0.88   |

Table S3: Methylated cytosines in exon 5 of TP53. All CpG cytosines in exon 5, both strands.<sup>S4</sup>

| Chain | Cytosine PDB residue number | Codon |
|-------|-----------------------------|-------|
| A     | 180                         | 152   |
| A     | 184                         | 153   |
| A     | 191                         | 156   |
| A     | 193                         | 156   |
| A     | 197                         | 158   |
| A     | 199                         | 158   |
| A     | 234                         | 170   |
| A     | 248                         | 175   |
| B     | 588                         | 152   |
| B     | 584                         | 154   |
| B     | 577                         | 156   |
| B     | 575                         | 157   |
| B     | 571                         | 158   |
| B     | 569                         | 159   |
| B     | 534                         | 170   |
| B     | 520                         | 175   |

Table S4: Base sequence used. Intron: 12215-12314. Exon: 12315-12498. Intron: 12499-12598.

```

Intron | ggtgct tacgcatggt tgtttctttg ctgccctctt ccagttgctt tatctgttca cttgtgccct gaacttcaac tetgtctcct tcctcttctt acag
Exon   | tactcc cctgccctca acaagatggt ttgccaactg gccaaagacct gccctgtgca gctgtggggt gattccacac ccccgcccgg caccgcgctc cgcgcatgg
Exon   | ccatctacaa gcagtcacag cacatgacgg aggttgtgag gcgctgcccc caccatgagc gctgctcaga tagcgatg
Intron | gt gagcagctgg ggctggagag acgacagggc tggttgccca ggtgccccag gcctctgatt cctcactgat tgctcttagg tctggcccct cctcagca

```

Table S5: Residue numbers, codons, and sequence information

| RESIDUES          | CODON | SEQUENCE | RESIDUES          | CODON | SEQUENCE |
|-------------------|-------|----------|-------------------|-------|----------|
| 101-103 (666-668) | 126   | TAC      | 197-199 (570-572) | 158   | CGC      |
| 104-106 (663-665) | 127   | TCC      | 200-202 (567-569) | 159   | GCC      |
| 107-109 (660-662) | 128   | CCT      | 203-205 (564-566) | 160   | ATG      |
| 110-112 (657-659) | 129   | GCC      | 206-208 (561-563) | 161   | GCC      |
| 113-115 (654-656) | 130   | CTC      | 209-211 (558-560) | 162   | ATC      |
| 116-118 (651-653) | 131   | AAC      | 212-214 (555-557) | 163   | TAC      |
| 119-121 (648-650) | 132   | AAG      | 215-217 (552-554) | 164   | AAG      |
| 122-124 (645-647) | 133   | ATG      | 218-220 (549-551) | 165   | CAG      |
| 125-127 (642-644) | 134   | TTT      | 221-223 (546-548) | 166   | TCA      |
| 128-130 (639-641) | 135   | TGC      | 224-226 (543-545) | 167   | CAG      |
| 131-133 (636-638) | 136   | CAA      | 227-229 (540-542) | 168   | CAC      |
| 134-136 (633-635) | 137   | CTG      | 230-232 (537-539) | 169   | ATG      |
| 137-139 (630-632) | 138   | GCC      | 233-235 (534-536) | 170   | ACG      |
| 140-142 (627-629) | 139   | AAG      | 236-238 (531-533) | 171   | GAG      |
| 143-145 (624-626) | 140   | ACC      | 239-241 (528-530) | 172   | GTT      |
| 146-148 (621-623) | 141   | TGC      | 242-244 (525-527) | 173   | GTG      |
| 149-151 (618-620) | 142   | CCT      | 245-247 (522-524) | 174   | AGG      |
| 152-154 (615-617) | 143   | GTG      | 248-250 (519-521) | 175   | CGC      |
| 155-157 (612-614) | 144   | CAG      | 251-253 (516-518) | 176   | TGC      |
| 158-160 (609-611) | 145   | CTG      | 254-256 (513-515) | 177   | CCC      |
| 161-163 (606-608) | 146   | TGG      | 257-259 (510-512) | 178   | CAC      |
| 164-166 (603-605) | 147   | GTT      | 260-262 (507-509) | 179   | CAT      |
| 167-169 (600-602) | 148   | GAT      | 263-265 (504-506) | 180   | GAG      |
| 170-172 (597-599) | 149   | TCC      | 266-268 (501-503) | 181   | CGC      |
| 173-175 (594-596) | 150   | ACA      | 269-271 (498-500) | 182   | TGC      |
| 176-178 (591-593) | 151   | CCC      | 272-274 (495-497) | 183   | TCA      |
| 179-181 (588-590) | 152   | CCG      | 275-277 (492-494) | 184   | GAT      |
| 182-184 (585-587) | 153   | CCC      | 278-280 (489-491) | 185   | AGC      |
| 185-187 (582-584) | 154   | GGC      | 281-283 (486-488) | 186   | GAT      |
| 188-190 (579-581) | 155   | ACC      |                   |       |          |
| 191-193 (576-578) | 156   | CGC      |                   |       |          |
| 194-196 (573-575) | 157   | GTC      |                   |       |          |

## References

- (S1) Pérez, A.; Noy, A.; Lankas, F.; Luque, F. J.; Orozco, M. The relative flexibility of B-DNA and A-RNA duplexes: database analysis. *Nucl. Ac. Res.* **2004**, *32*, 6144.
- (S2) Lu, X.-J.; Olson, W. K. 3DNA: a versatile, integrated software system for the analysis, rebuilding and visualization of three-dimensional nucleic-acid structures. *Nat. Protocols* **2008**, *3*, 1213–1227.
- (S3) Sadowska-Aleksiejew, A.; Rak, J.; Voityuk, A. A. Effects of intra base-pairs flexibility on hole transfer coupling in DNA. *Chem. Phys. Lett.* **2006**, *429*, 546 – 550.
- (S4) Tornaletti, S.; Pfeifer, G. P. Complete and tissue-independent methylation of CpG sites in the p53 gene: implications for mutations in human cancers. *Oncogene* **1995**, *10*, 1493–1499.
